# Supplementary material for: Land-use perturbations in ley grassland decouple the degradation of ancient soil organic matter from the storage of newly derived carbon inputs
Source: Copernicus journal article supplement (doi:10.5194/soil-6-435-2020), 2020-09-29

Supplement of SOIL, 6, 435–451, 2020  
<https://doi.org/10.5194/soil-6-435-2020-supplement>  
© Author(s) 2020. This work is distributed under  
the Creative Commons Attribution 4.0 License.

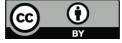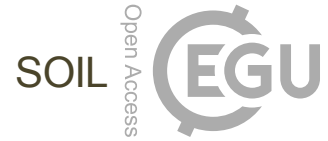

*Supplement of*

## **Land-use perturbations in ley grassland decouple the degradation of ancient soil organic matter from the storage of newly derived carbon inputs**

**Marco Panettieri et al.**

*Correspondence to:* Abad Chabbi (abad.chabbi@inrae.fr)

The copyright of individual parts of the supplement might differ from the CC BY 4.0 License.

Figure S1.

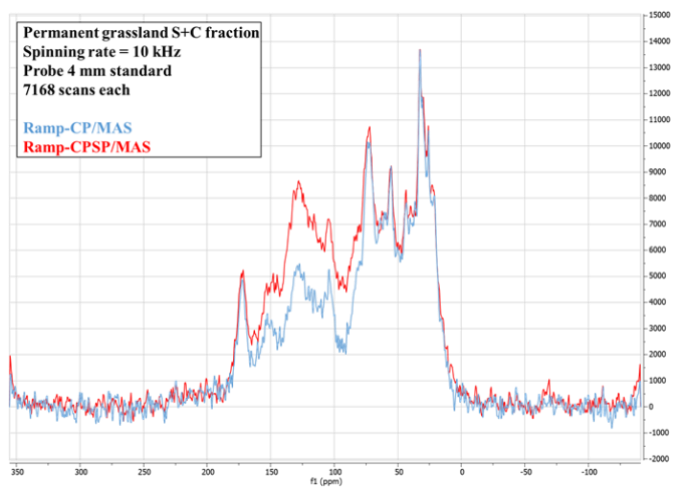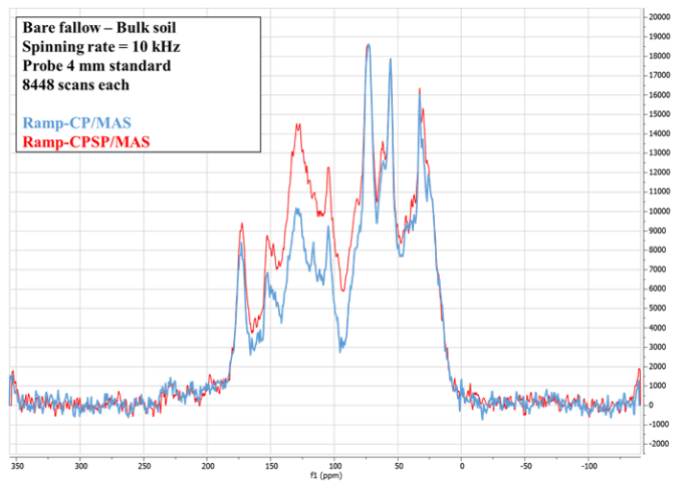

Supplement: Supplementary file 1 [file soil-6-435-2020-supplement.pdf]
